# Supplementary material for: Design and test of a rigid endomicroscopic system for multimodal imaging and femtosecond laser ablation
Source: J Biomed Opt. 2023 Jun 28;28(6):066004. doi: 10.1117/1.JBO.28.6.066004 (PMC10306116; doi:10.1117/1.JBO.28.6.066004)
Supplement: Supplementary file 1 [file JBO_028_066004_SD001.pdf]

## Supplementary information for

### **Design and test of a rigid endomicroscopic system for multimodal imaging and femtosecond laser ablation**

**Chenting Lai,<sup>a</sup> Matteo Calvarese,<sup>b</sup> Karl Reichwald,<sup>a</sup> Hyeonsoo Bae,<sup>b,c</sup> Mohammadsadegh Vafaeinezhad,<sup>b,c</sup> Tobias Meyer-Zedler,<sup>b,c</sup> Franziska Hoffmann,<sup>d</sup> Anna Mühlig,<sup>d</sup> Tino Eidam<sup>e</sup>, Fabian Stutzki<sup>e</sup>, Bernhard Messerschmidt,<sup>a</sup> Herbert Gross,<sup>f</sup> Michael Schmitt,<sup>c</sup> Orlando Guntinas-Lichius,<sup>d</sup> and Jürgen Popp,<sup>b,c</sup>**

<sup>a</sup>GRINTECH GmbH, Jena, Germany

<sup>b</sup>Leibniz Institute of Photonic Technology, Member of Leibniz Health Technologies, Member of the Leibniz Centre for Photonics in Infection Research (LPI), Jena Germany

<sup>c</sup>Institute of Physical Chemistry (IPC) and Abbe Center of Photonics (ACP), Friedrich Schiller University Jena, Member of the Leibniz Centre for Photonics in Infection Research (LPI), Jena, Germany

<sup>d</sup>Department of Otorhinolaryngology, Jena University Hospital, Jena Germany

<sup>e</sup>Active Fiber Systems GmbH, Jena Germany

<sup>f</sup>Fraunhofer Institute for Applied Optics and Precision Engineering, Jena Germany

### **Detection unit in the multimodal endomicroscopic imaging**

For separating signals from the tissue into different wavelengths, a proper detection unit including many filters and four photomultiplier tubes (PMTs, Hamamatsu) was built. The output of the SM fiber for ICG detection was collimated by using a fiber collimator and then filtered to suppress the laser reflection. Following filters were employed: LP800, LP808, LP830, BP850/40, and SP950. The nonlinear signals coming from the multimode fiber were collimated by a lens 25 mm in focal length and filtered by a SP700. Then, two dichroic mirrors were used to spatially separate them into three wavelength ranges of interest: (1) dichroic mirror LP605 transmits only the CARS signal around 650nm to a BP650/40 and subsequently to an  $f = 30$  mm lens which focuses the beam on the PMT. The reflected signals are further split by a dichroic LP495, and the TPEF spectral range is reflected and directed to an  $f = 40$  mm lens and a PMT, while the SHG is transmitted, filtered by a BP514/3 and focused by an  $f = 30$  mm lens onto the third PMT.

## Multimodal endomicroscopic image of the tissue sample

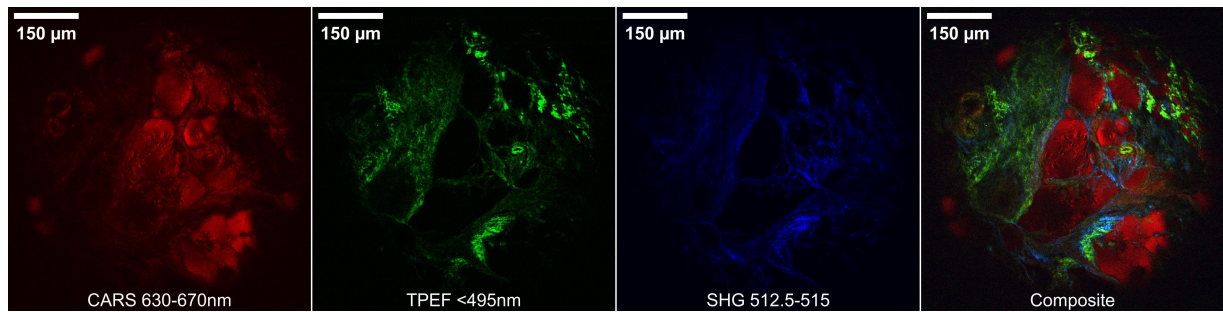

Fig. S1 Endomicroscopic multimodal images of a head and neck tissue from a patient not receiving ICG. CARS (red), TPEF (green), and SHG (blue) display different contrasts for methylene groups abundant in lipids and protein, auto-fluorophore and collagen content, respectively. Three modalities were excited by a ps pulsed laser (Pump: 795 nm / 30ps / 22mW; Stokes: 1030 nm / 72ps / 100mW) and acquired simultaneously by 2048×2048 pixels with 6 µs in dwell time, and frame averaged by 5 times. Images were acquired by ScanImage (Vidrio Technologies) [33]. The study was approved by the ethics committee of the university hospital Jena (No. 4291-12/14).

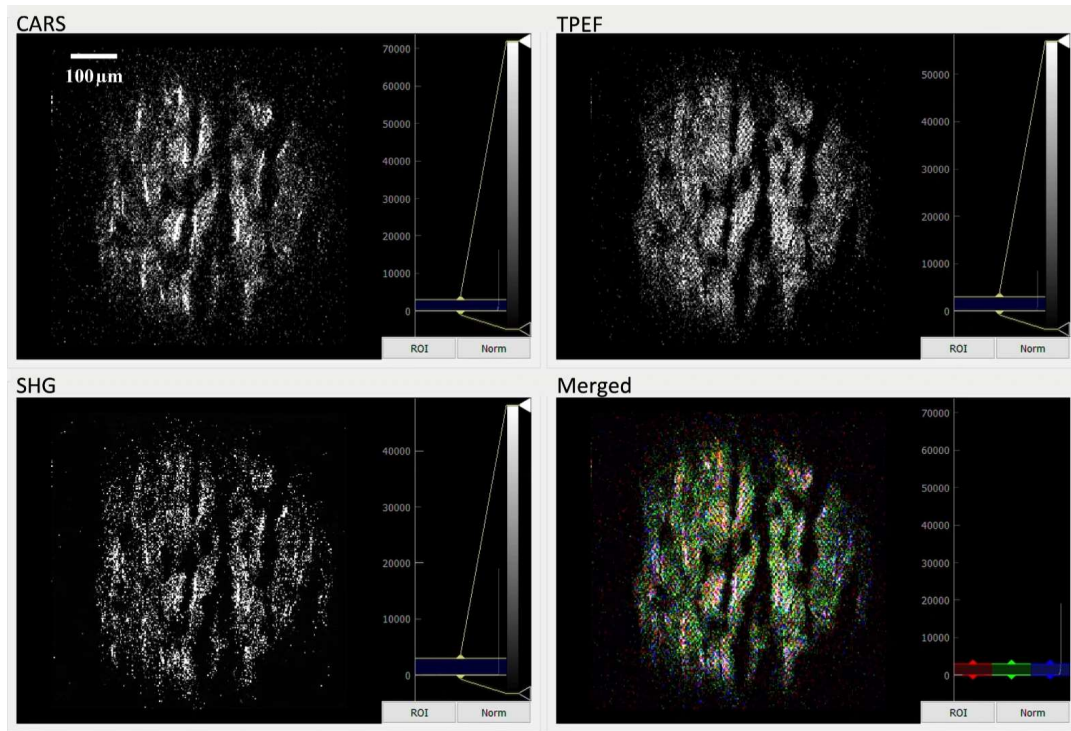

Fig. S2 Endoscopic live imaging of a chicken meat sample in ex-vivo, CARS (red), TPEF (green), and SHG (blue). To achieve a fast scanning of about 3.3 fps over a FOV of around 700  $\mu\text{m}$ , the number of pixels was decreased to 250x250 pixels, with a pixel dwell time of 3  $\mu\text{s}$ . The imaging was performed with a custom-made and python-based software, that utilizes the Scope Foundry (<http://www.scopefoundry.org/>) framework. (MP4, 8.5 MB).
